# Supplementary material for: Sex differences in the serum level of endogenous ligands for estrogen receptor β in the elderly population
Source: PubMed Central journal article supplement (PMC4863166; doi:10.1038/srep25878), 2016-05-11
Supplement: srep25878-s1.pdf [file srep25878-s1.pdf]

**Supplementary information**

**Sex differences in the serum level of endogenous ligands for  
estrogen receptor  $\beta$  in the elderly population**

Miyuki KOBAYASHI<sup>1,2</sup>, Nobuhiro SUGIYAMA<sup>1,\*</sup>, Daimei SASAYAMA<sup>1</sup>,

Hidehiko SASAMOTO<sup>3</sup>, Yoshimichi MIYASHIRO<sup>3</sup>, Kunimasa ARIMA<sup>2</sup>,

Shinsuke WASHIZUKA<sup>1</sup>

<sup>1</sup>Department of Psychiatry, Shinshu University School of Medicine, 3-1-1 Asahi, Matsumoto,

Nagano 390-8621, Japan; <sup>2</sup>Department of Psychiatry, National Hospital Organization Komoro

Kogen Hospital, 4598 Ko, Komoro, Nagano 384-8540, Japan; <sup>3</sup>ASKA Pharmaceutical Medical

Co., Ltd. 5-36-1 Shimosakunobe, Kawasaki Takatsu-ku, Kanagawa 213-8522, Japan;

*\*Corresponding author and person to whom reprint requests should be addressed:*

Nobuhiro Sugiyama, MD, PhD

Supplementary Information Figure S1

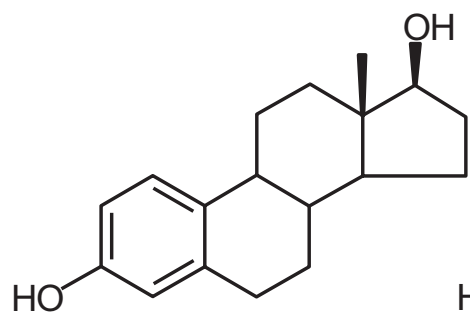

17 $\beta$ -Estradiol  
(E2)

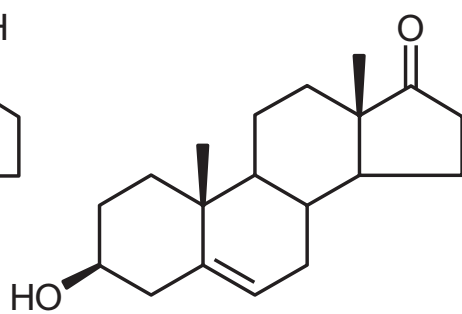

Dehydroepiandrosterone  
(DHEA)

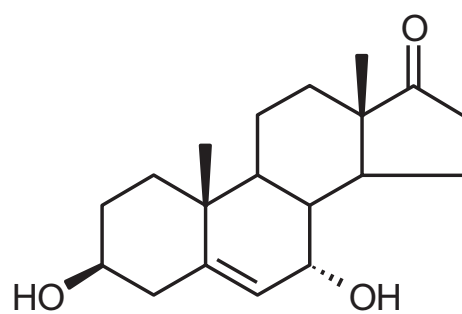

7 $\alpha$ -hydroxydehydroepiandrosterone  
(7 $\alpha$ -OH-DHEA)

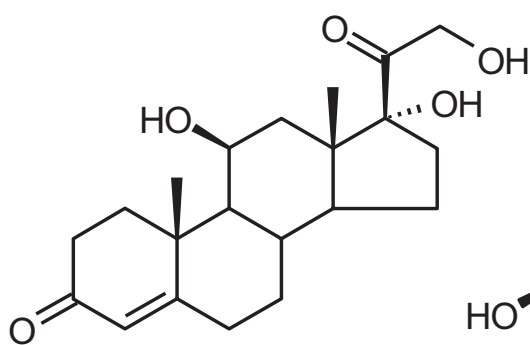

Cortisol  
(F)

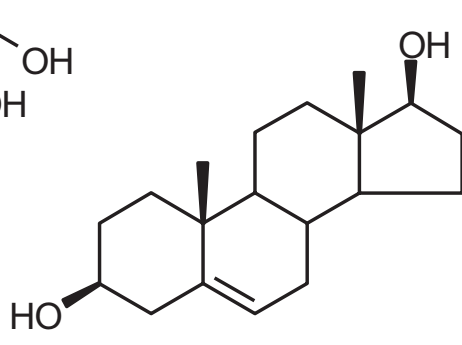

Androstenediol  
( $\Delta$ 5-diol)

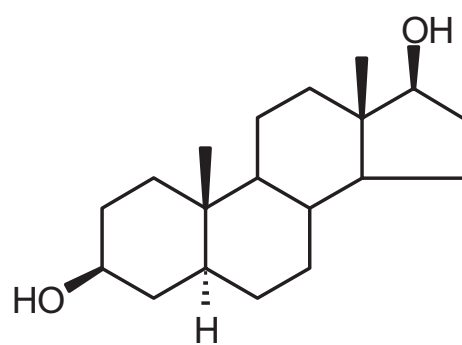

5 $\alpha$ -androstane-3 $\beta$ , 17 $\beta$ -diol  
(3 $\beta$ Adiol)

Figure S1. Chemical structures of the steroids of interest

**Supplementary Information Figure S2**

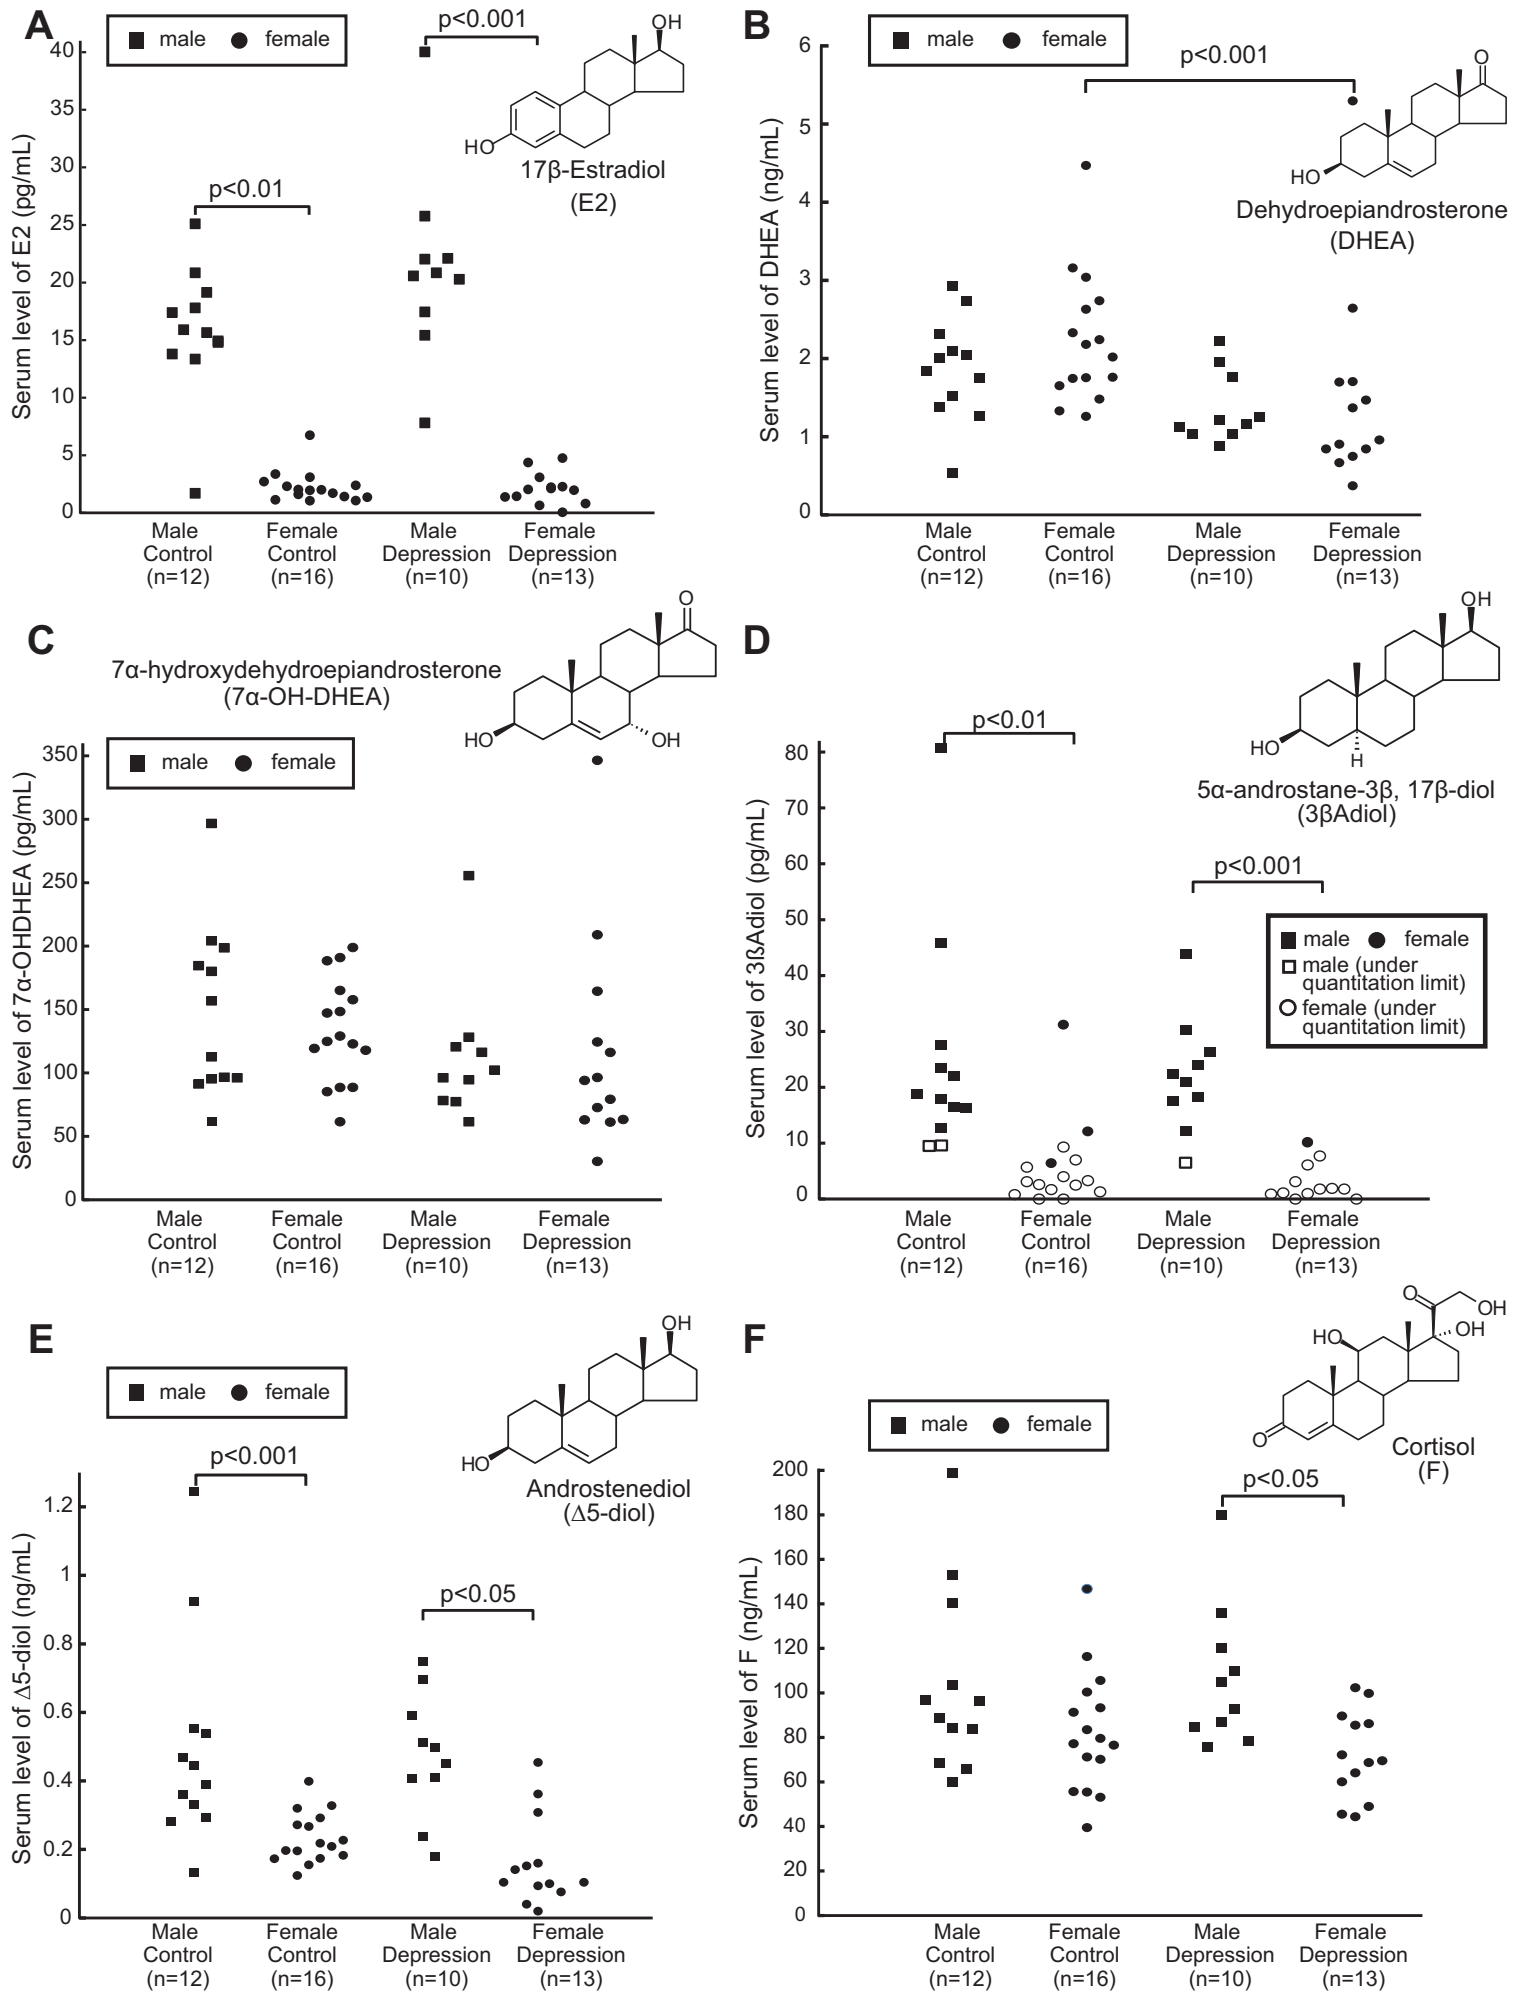

**Figure S2. Serum Levels of Steroids**

Supplementary Information Figure S3

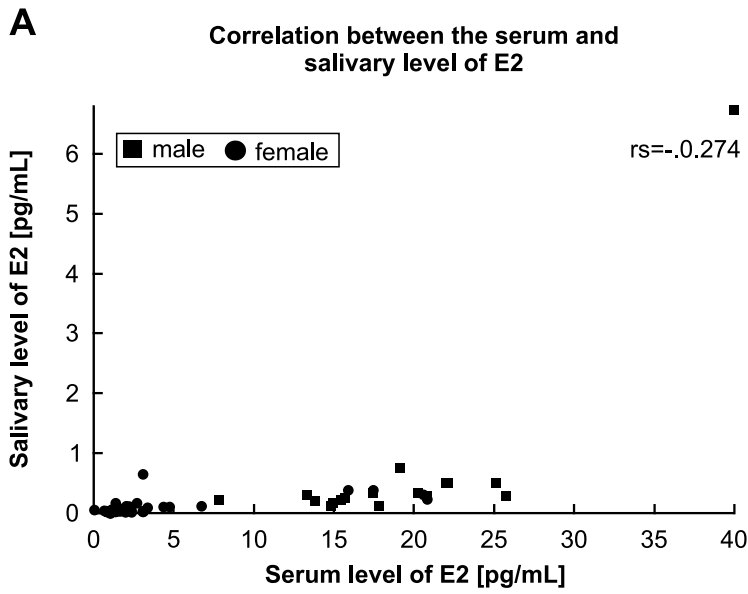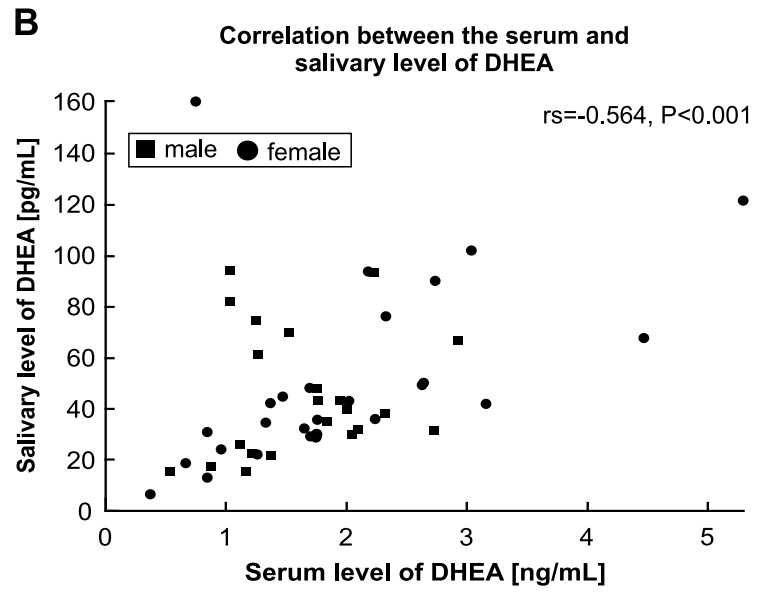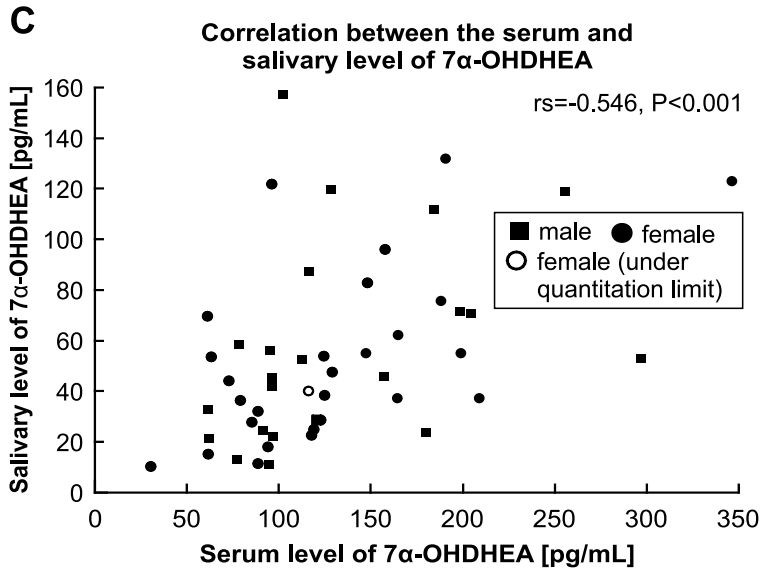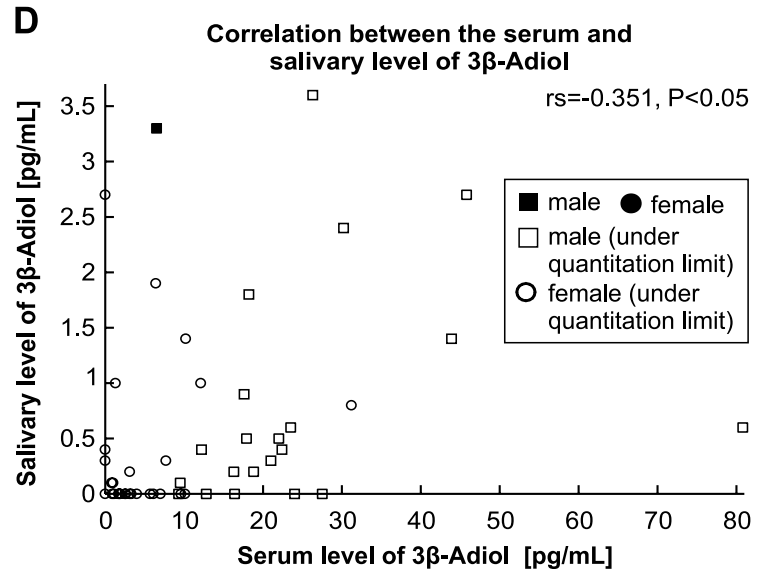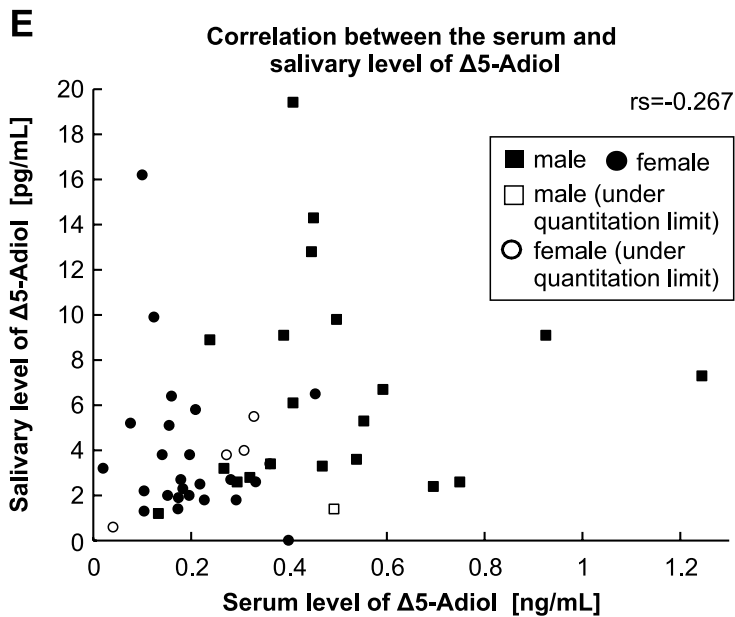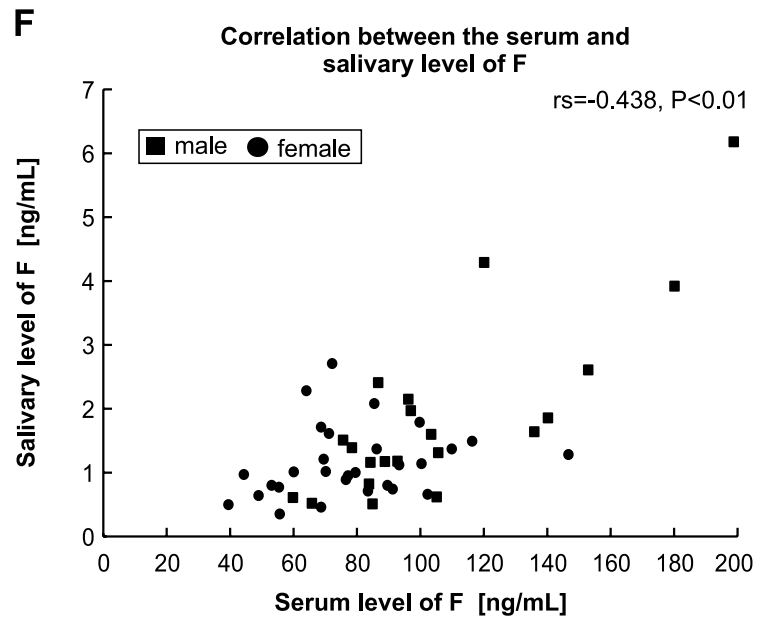

Figure S3. Correlation between the Serum and Salivary Levels of Each Steroid
